# Supplementary material
Source: PubMed Central journal article supplement (PMC384800)

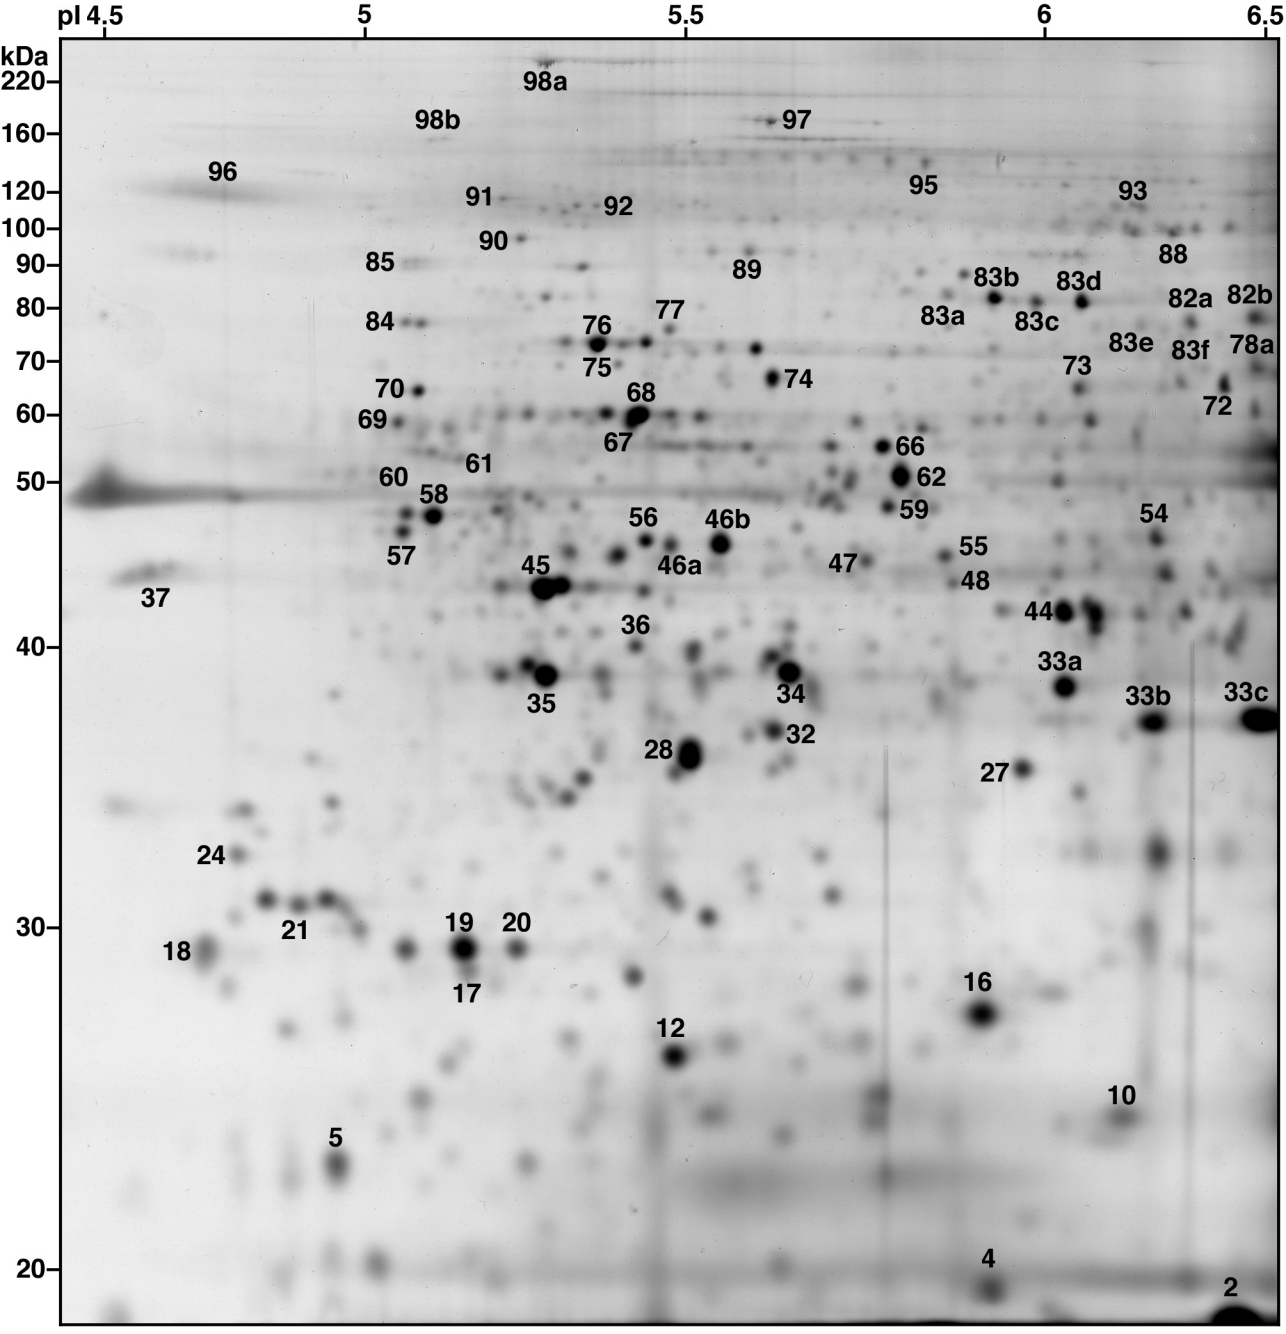

Supplement: pnas_101_13_4643__1.pdf [file pnas_101_13_4643__1.pdf]

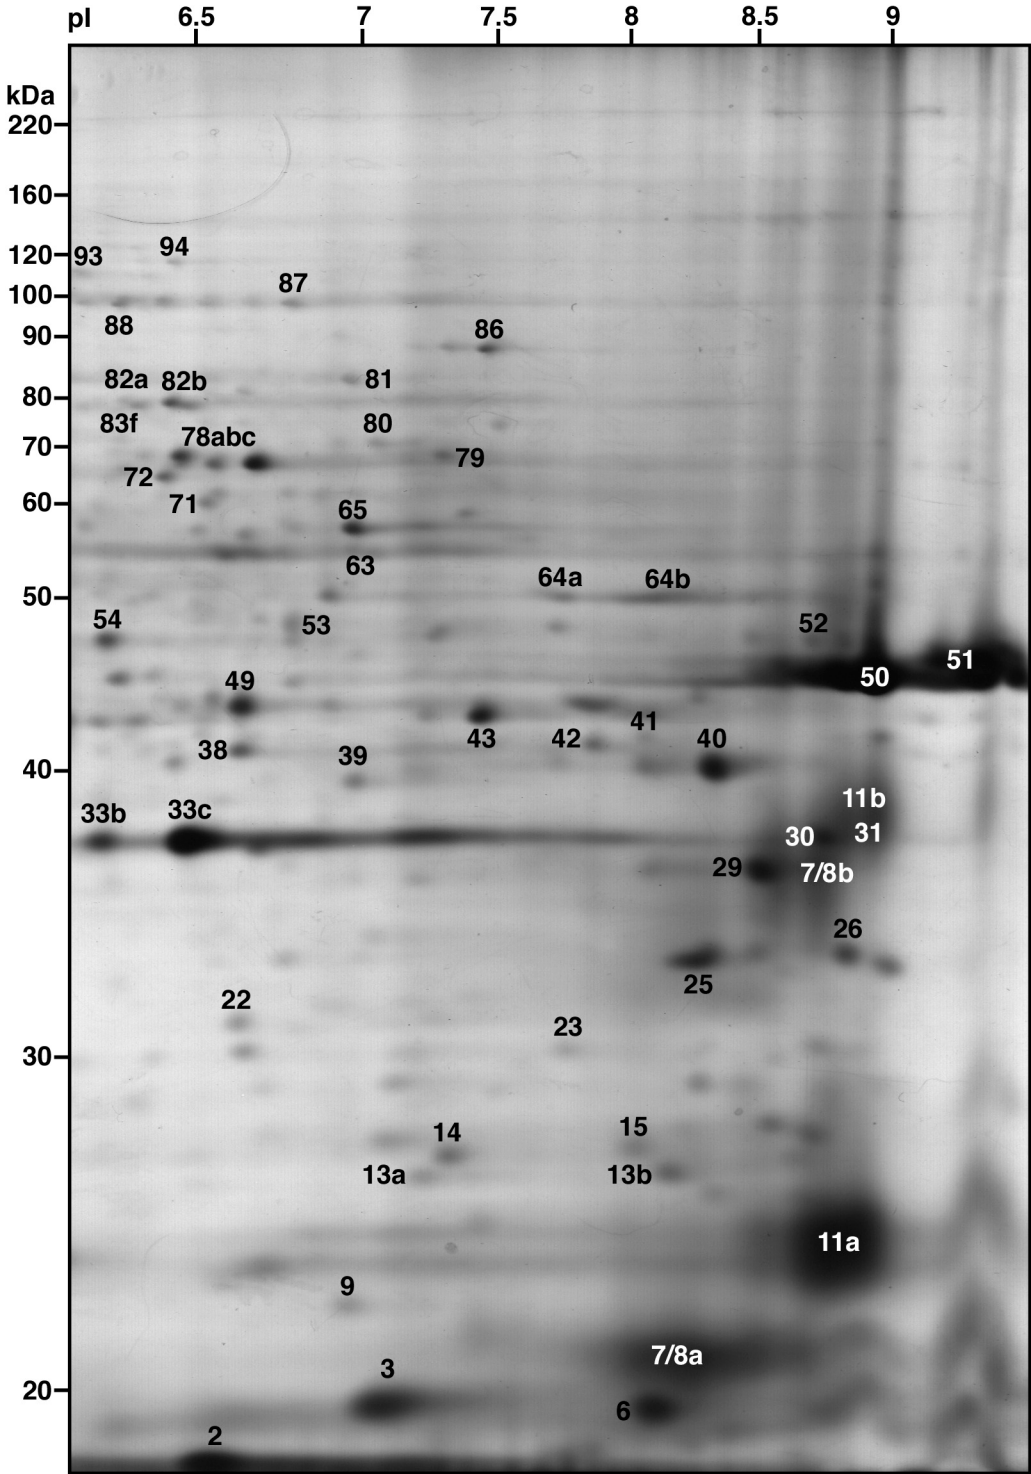

Supplement: pnas_101_13_4643__2.pdf [file pnas_101_13_4643__2.pdf]
